# Supplementary material for: All-inorganic and lead-free BiI3 thin film solar cells by iodization of BiSI thin films
Source: Royal Society of Chemistry journal article supplement (doi:10.1039/d0tc03753b), 2020-01-01
Supplement: d0tc03753b1.pdf [file d0tc03753b1.pdf]

## Electronic Supplementary Information

### All-Inorganic and Lead-Free BiI<sub>3</sub> Thin Film Solar Cells by Iodization of BiSI Thin Films

Yuxiang Wang,<sup>1,2</sup> Xinan Shi,<sup>1,2</sup> Gang Wang,<sup>1,2</sup> Junye Tong<sup>1,3</sup> and Daocheng Pan<sup>1,2\*</sup>

<sup>1</sup>*State Key Laboratory of Rare Earth Resource Utilization, Changchun Institute of Applied Chemistry, Chinese Academy of Sciences, 5625 Renmin Street, Changchun, Jilin 130022, China;*

<sup>2</sup>*University of Science and Technology of China, Hefei, Anhui 230026, China;*

<sup>3</sup>*Center for Advanced Optoelectronic Functional Materials Research, and Key Laboratory of UV-Emitting Materials and Technology of Ministry of Education, Northeast Normal University, 5268 Renmin Street, Changchun, China*

Tel & fax: +86-431-85262544; e-mail: pan@ciac.ac.cn

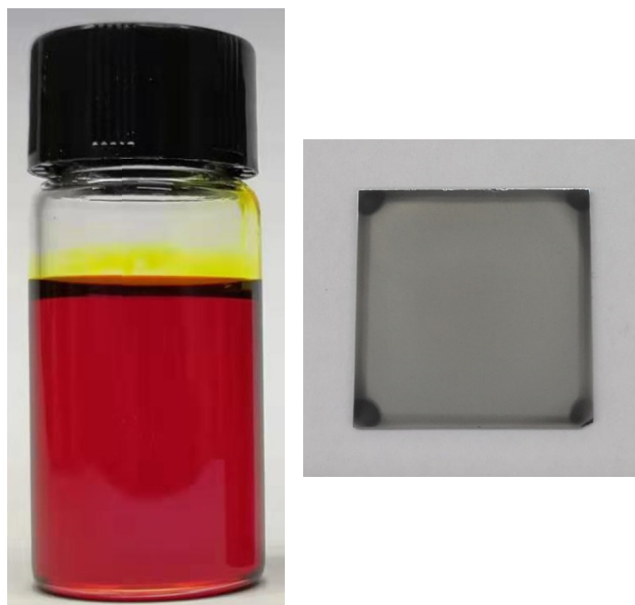

**Figure S1.** The as-prepared BiSI solution (left) and the iodized BiI<sub>3</sub> film (right).

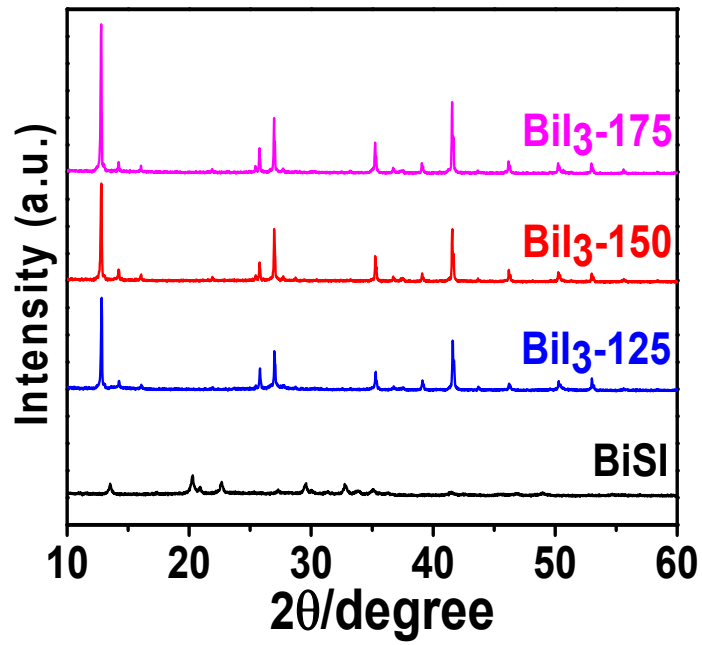

**Figure S2.** XRD patterns of BiSI thin film and BiI<sub>3</sub> thin films iodized at different temperatures.

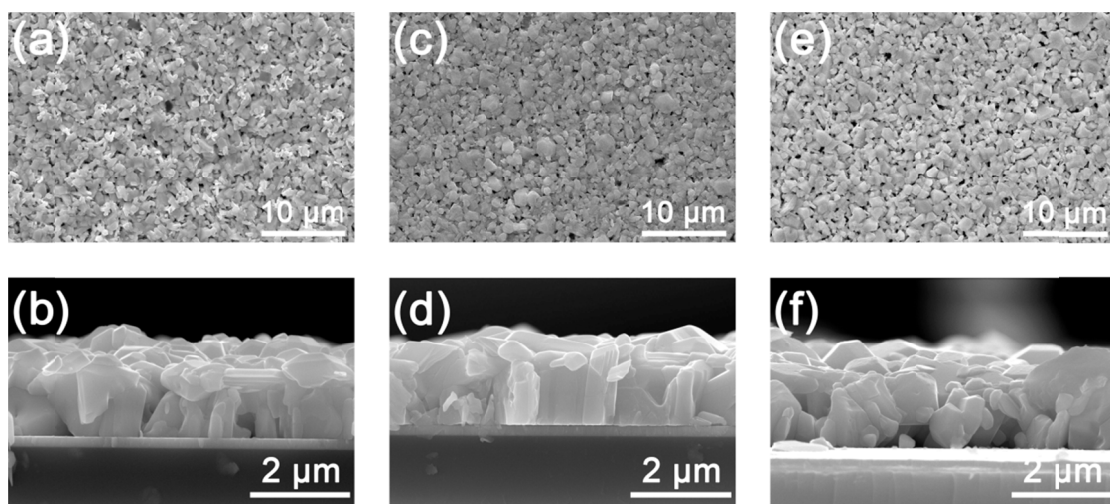

**Figure S3.** SEM images of  $\text{BiI}_3$  thin films with different iodination duration time ((a, b) 15min; (c, d) 30min; (e, f) 45min).

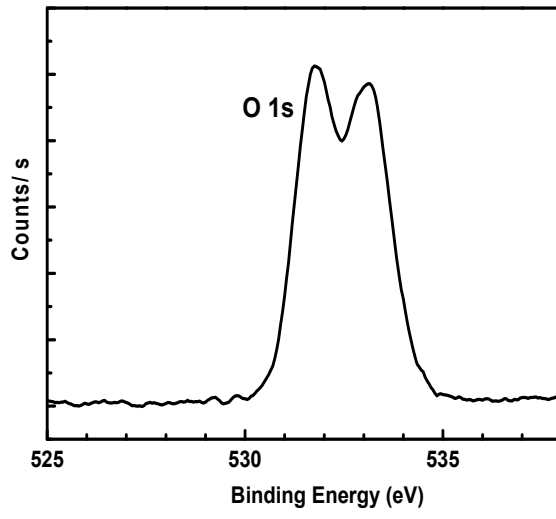

**Figure S4.** XPS spectrum of O 1s of BiI<sub>3</sub> thin film.

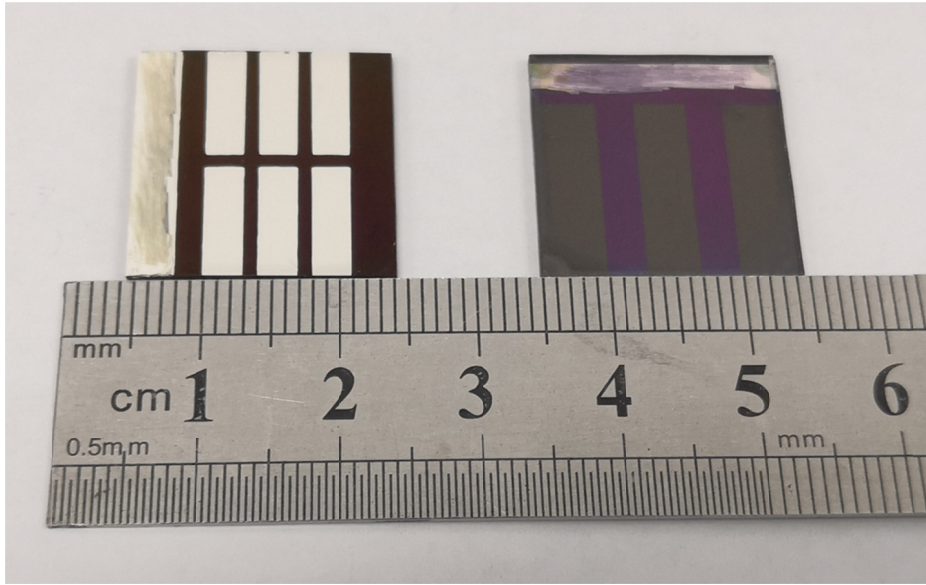

**Figure S5.** The as-prepared BiI<sub>3</sub> thin film solar cell devices.

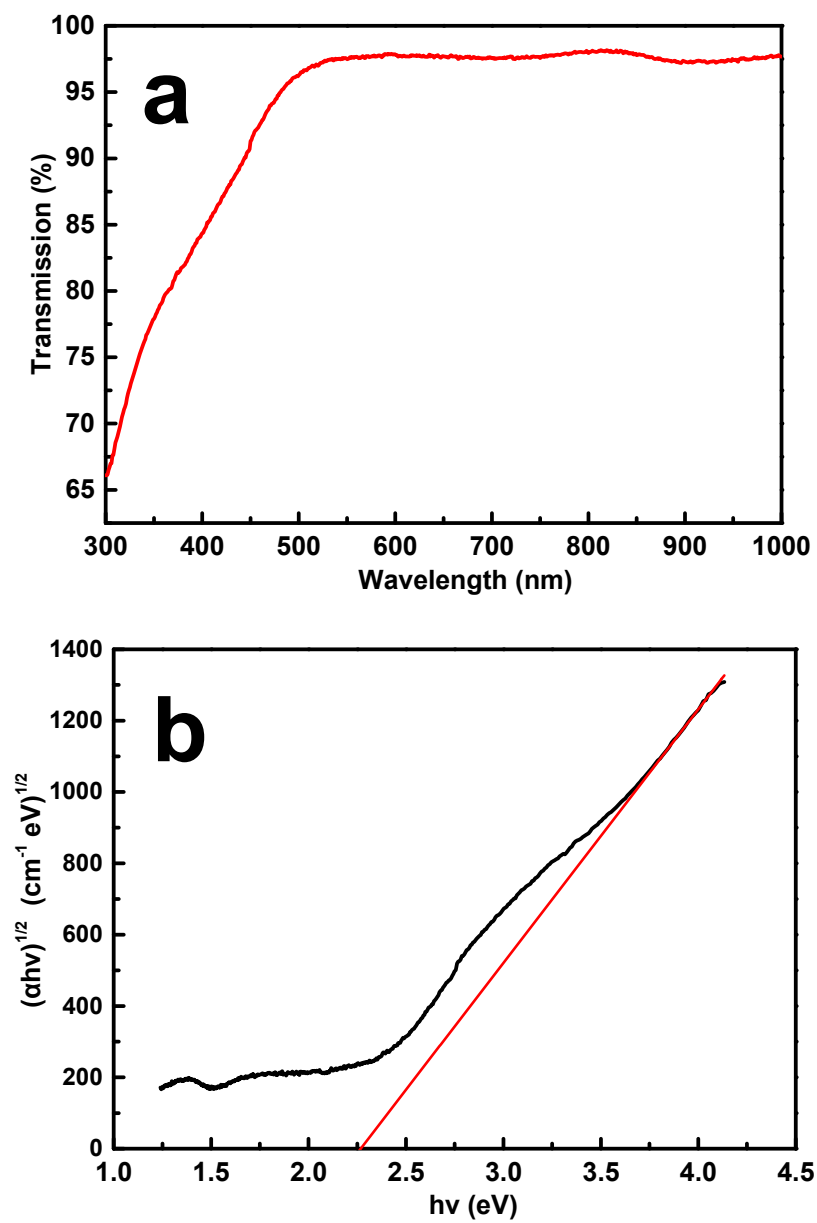

**Figure S6.** Transmission spectrum (a) and Tauc plot (b) of 10 nm thick  $V_2O_5$  thin film.

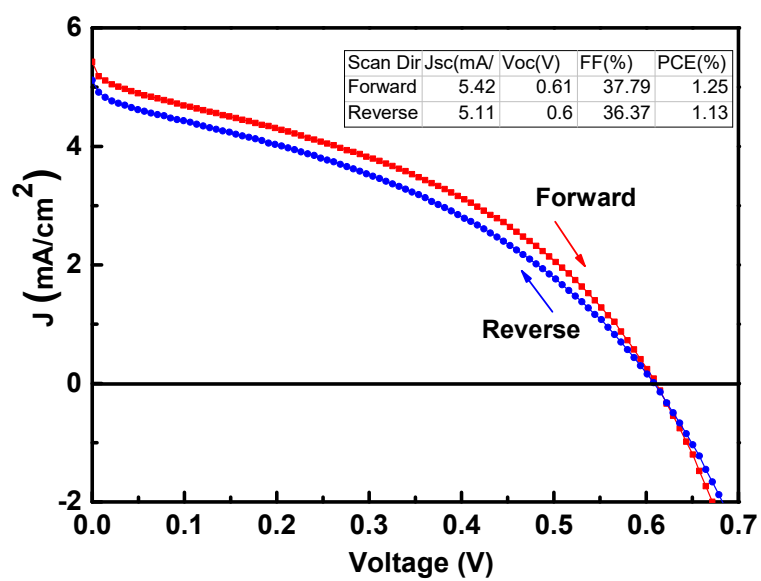

**Figure S7.** J-V curves of the BiI<sub>3</sub> solar cell measured at a forward direction and a reverse direction.



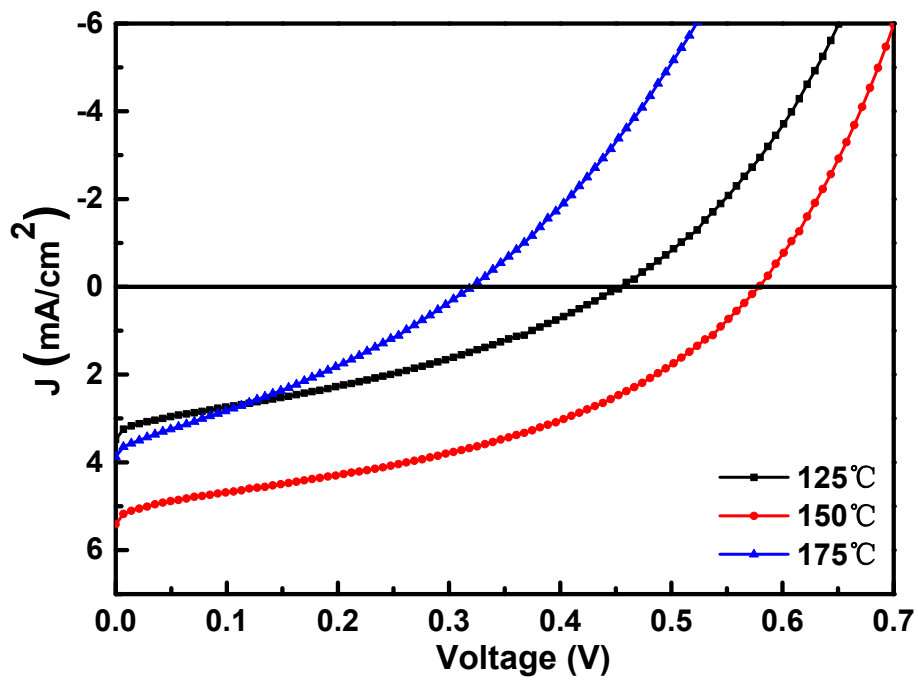

**Figure S8.** J-V curves of the BiI<sub>3</sub> thin film solar cells iodized at different temperatures.

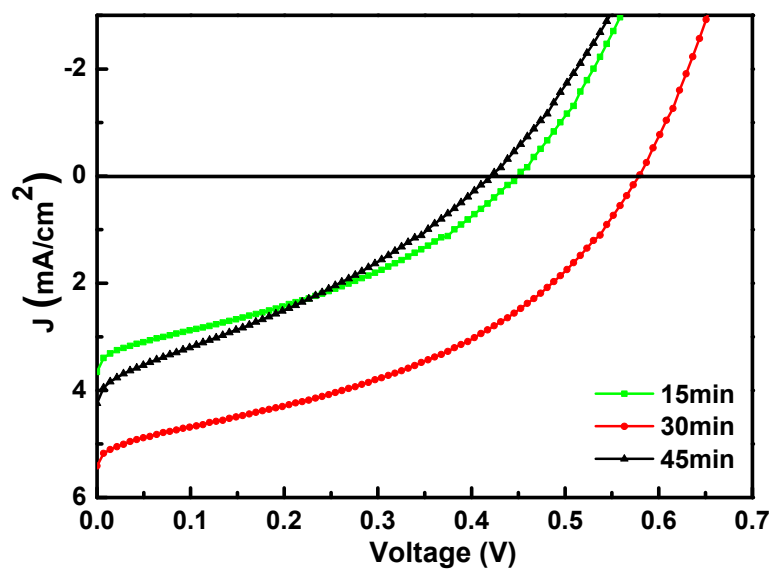

**Figure S9.** J-V curves of the BiI<sub>3</sub> thin film solar cells iodized with different time.

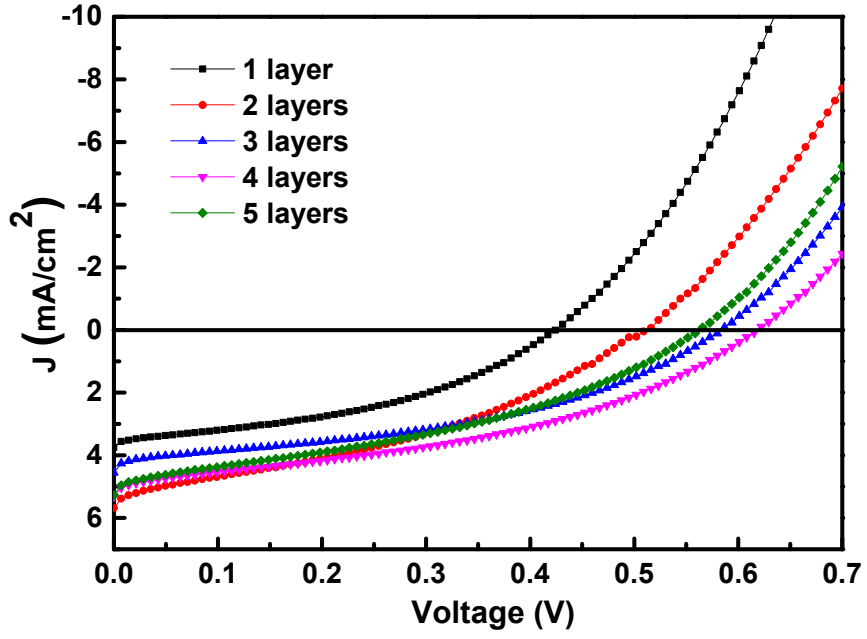

**Figure S10.** J-V curves of the  $\text{BiI}_3$  thin film solar cells with different thicknesses for  $\text{BiI}_3$  thin films.

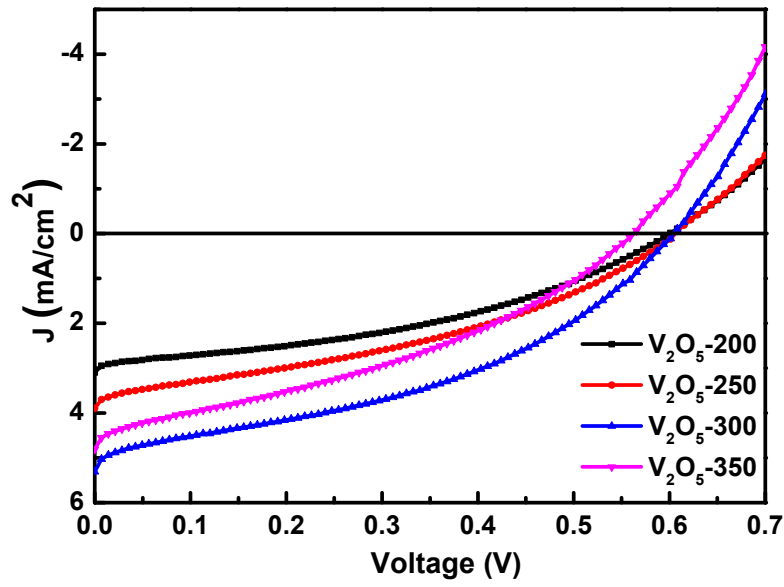

**Figure S11.** J-V curves of the BiI<sub>3</sub> thin film solar cells with different sintering temperatures for V<sub>2</sub>O<sub>5</sub> thin films.

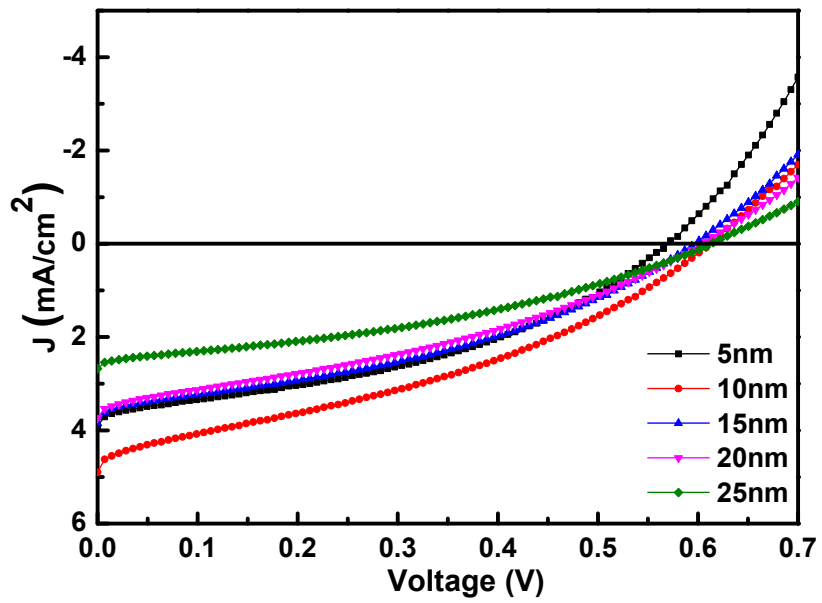

**Figure S12.** J-V curves of the BiI<sub>3</sub> thin film solar cells with different thicknesses for V<sub>2</sub>O<sub>5</sub> thin films.

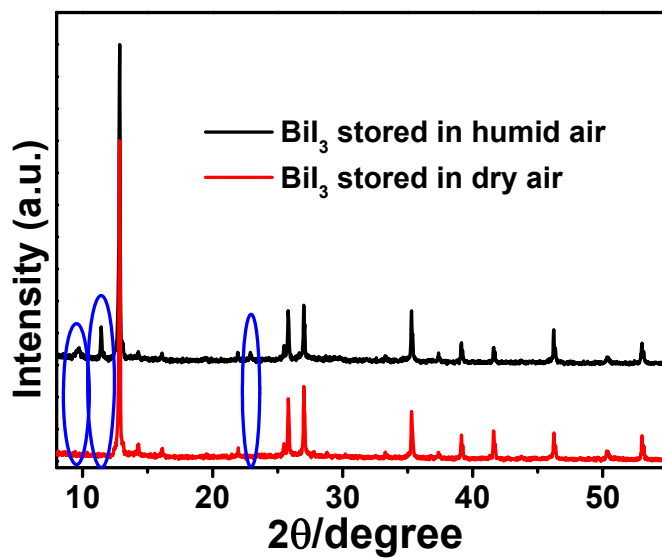

**Figure S13.** XRD patterns of the BiI<sub>3</sub> thin films stored in humid air and in dry air for 10 days.
